# Supplementary material for: Unraveling the genetic complexities of combined retinal dystrophy and hearing impairment
Source: Springer Nature journal article supplement (doi:10.1007/s00439-021-02303-1), 2021-06-19
Supplement: MOESM1 [file 439_2021_2303_MOESM1_ESM.pdf]

**Supplementary Table 1** Clinical characteristics of index patients

| ID <sup>a</sup> | Ethn. | Age | Sex | HLO   | HLS   | Aud.Shape    | TYM  | VIO   | NL   | RV   | VA (LogMAR)    | CME | RA | MA | PED | BPD | BC | SEI |
|-----------------|-------|-----|-----|-------|-------|--------------|------|-------|------|------|----------------|-----|----|----|-----|-----|----|-----|
| 1               | Iran  | 65  | F   | Pre.  | Prof. | Flat         | A    | 27    | X    | X    | OD 1.3; OS 0.6 | X   | X  | X  | X   | X   | X  |     |
| 2               | Iran  | 37  | M   | Pre.  | n.a.  | n.a.         | n.a. | 32    | X    | X    | OD 1.0; OS 0.5 | X   | X  | X  |     | X   | X  | X   |
| 3               | Iran  | 45  | F   | Pre.  | n.a.  | n.a.         | n.a. | 15    | X    | X    | OD 1.0; OS 1.0 |     |    |    |     |     |    |     |
| 4               | Iran  | 35  | F   | Pre.  | n.a.  | n.a.         | n.a. | Birth | X    | X    | OD 1.0; OS 2.0 | X   | X  |    | X   | X   | X  | X   |
| 5               | Iran  | 46  | M   | Pre.  | n.a.  | n.a.         | n.a. | 20    | X    | X    | OD 3.0; OS 2.0 | X   | X  |    |     | X   |    |     |
| 6               | Iran  | 23  | F   | Pre.  | Prof  | Flat         | A    | 25    | X    | X    | OD 0.7; OS 1.0 |     |    | X  |     | X   |    |     |
| 7               | Iran  | 21  | F   | Pre.  | n.a.  | n.a.         | n.a. | 3     | X    | X    | OD 0.7; OS 0.5 | X   | X  | X  |     | X   |    |     |
| 8               | Iran  | 5   | F   | Pre.  | Prof. | Flat         | n.a. | Birth | X    | X    | n.a.           | X   |    |    |     |     |    |     |
| 9               | Iran  | 8   | M   | Pre.  | Prof. | Flat         | n.a. | 4     | X    | X    | OD 3.2; OS 2.0 |     | X  | X  | X   |     | X  |     |
| 10              | Iran  | 30  | M   | Pre.  | n.a.  | n.a.         | A    | 20    | X    | X    | OD 0.2; OS 0.4 | X   | X  | X  | X   |     |    | X   |
| 11              | Mex.  | 51  | F   | Pre.  | n.a.  | n.a.         | n.a. | 34    | X    | X    | OD 3.2; OS 0.2 |     | X  |    | X   | X   | X  | X   |
| 12              | Iran. | 30  | M   | Pre.  | Prof. | Flat         | n.a. | 2     | X    | X    | OD 2.0; OS 2.0 |     |    | X  |     | X   |    |     |
| 13              | Mex.  | 22  | F   | Pre.  | n.a.  | n.a.         | n.a. | 18    | X    | X    | OD 0.2; OS 0.3 | X   |    |    | X   | X   |    | X   |
| 14              | Mex.  | 8   | M   | Pre.  | n.a.  | n.a.         | n.a. | 8     | X    | X    | OD 0.9; OS 0.9 |     |    |    |     | X   |    | X   |
| 15              | Iran  | 37  | F   | Pre.  | n.a.  | n.a.         | n.a. | 15    | X    | X    | OD 0.4; OS 0.4 |     | X  |    |     | X   | X  |     |
| 16              | Iran  | 36  | M   | Pre.  | n.a.  | n.a.         | n.a. | 4     | X    | X    | OD 0.7; OS 2.0 |     | X  | X  | X   | X   |    |     |
| 17              | Mex.  | 7   | F   | Pre.  | Sev.  | Flat         | n.a. | n.a.  | n.a. | n.a. | OD 1.0; OD 0.7 | X   |    |    | X   |     |    |     |
| 18              | Iran  | 38  | F   | Post. | n.a.  | n.a.         | n.a. | 12    | X    | X    | OD 0.3; OS 0.3 | X   | X  | X  |     | X   | X  |     |
| 21              | Iran  | 28  | F   | n.a.  | n.a.  | n.a.         | n.a. | 19    | X    | X    | OD 0.3; OS 0.2 | X   |    | X  | X   | X   | X  |     |
| 22              | Iran  | 46  | F   | Post. | n.a.  | n.a.         | n.a. | 35    | X    | X    | OD 0.7; OS 2.0 |     | X  | X  |     | X   |    |     |
| 23              | Iran  | 31  | F   | Post. | n.a.  | n.a.         | n.a. | 12    | X    | X    | OD 0.2; OS 0.4 |     | X  | X  |     | X   | X  |     |
| 24              | Iran  | 41  | F   | Post. | Sev.  | Down slop.   | n.a. | 40    | X    | X    | OD 0.7; OS 0.7 |     | X  | X  |     | X   | X  |     |
| 25              | Iran  | 26  | M   | Post. | Mod.  | Steep. slop. | n.a. | 16    | X    | X    | OD 0.3; OS 0.3 | X   | X  | X  |     | X   | X  |     |
| 26              | Iran  | 52  | M   | Pre.  | n.a.  | n.a.         | n.a. | 23    | X    | X    | OD 0.5; OS 0.6 | X   | X  | X  |     | X   | X  |     |
| 27              | Mex.  | 45  | F   | Post. | n.a.  | n.a.         | n.a. | 23    | X    | X    | OD 0.7; OS 0.6 |     |    |    | X   | X   | X  |     |
| 28              | Mex.  | 29  | M   | Post. | n.a.  | n.a.         | n.a. | 20    | X    | X    | OD 0.5; OS 0.5 | X   | X  | X  | X   | X   | X  |     |
| 29              | Iran  | 30  | F   | n.a.  | n.a.  | n.a.         | n.a. | 18    | X    | X    | OD 0.4; OS 0.3 |     | X  |    |     | X   | X  |     |

|    |      |    |   |       |       |              |      |       |      |      |                |   |   |   |   |   |   |  |
|----|------|----|---|-------|-------|--------------|------|-------|------|------|----------------|---|---|---|---|---|---|--|
| 30 | Iran | 56 | M | n.a.  | n.a.  | n.a.         | n.a. | Birth | X    | X    | OD 3.0; OS 3.0 |   | X | X | X | X | X |  |
| 31 | Iran | 45 | F | Pre.  | n.a.  | n.a.         | n.a. | Birth | X    | X    | OD 2.0; OS 2.0 |   | X | X | X | X | X |  |
| 32 | Iran | 40 | M | n.a.  | n.a.  | n.a.         | n.a. | 25    | X    | X    | OD 0.2; OS 0.2 |   | X | X |   |   |   |  |
| 34 | Iran | 44 | M | Pre.  | n.a.  | n.a.         | n.a. | 22    | X    | X    | OD 2.9; OS 2.9 |   | X | X |   | X | X |  |
| 35 | Iran | 45 | F | Post. | n.a.  | n.a.         | n.a. | 7     | X    | X    | OD 1.0; OS 2.0 | X | X | X | X |   |   |  |
| 36 | Iran | 69 | M | Post. | n.a.  | n.a.         | n.a. | 51    | X    | X    | OD 0.2; OS 0.2 |   | X | X | X |   | X |  |
| 37 | Iran | 24 | F | Pre.  | n.a.  | n.a.         | n.a. | 14    | X    | X    | OD 0.3; OS 0.4 | X | X | X |   | X | X |  |
| 38 | Iran | 66 | M | Post. | n.a.  | n.a.         | n.a. | Birth | X    | X    | OD 0.5; OS 0.3 |   | X | X |   | X | X |  |
| 39 | Iran | 32 | F | Post. | n.a.  | n.a.         | n.a. | 26    | X    | X    | OD 0.8; OS 0.8 |   | X | X |   | X | X |  |
| 41 | Iran | 24 | M | n.a.  | n.a.  | n.a.         | n.a. | 14    | X    | X    | OD 0.4; OS 0.4 |   |   |   | X |   |   |  |
| 42 | Iran | 25 | F | Pre.  | Sev.  | Flat         | A    | 7     | X    | X    | OD 0.3; OS 0.2 |   | X | X | X | X |   |  |
| 43 | Iran | 45 | F | Post. | n.a.  | n.a.         | n.a. | 7     | X    | X    | OD 1.0; OS 2.0 |   | X | X | X | X |   |  |
| 44 | Iran | 42 | F | Pre.  | Mod   | Flat         | n.a. | 38    | X    | X    | OD 0.9; OS 2.0 |   |   | X |   | X | X |  |
| 45 | Iran | 40 | M | n.a.  | n.a.  | n.a.         | n.a. | 10    | X    | X    | OD 0.3; OS 0.2 |   |   |   |   |   |   |  |
| 46 | Iran | 20 | F | Birth | n.a.  | n.a.         | n.a. | 12    | X    | X    | n.a.           |   |   | X |   | X | X |  |
| 47 | Iran | 33 | M | Post. | Sev   | Steep. slop. | A    | 17    | X    | X    | OD 3.2; OS 3.2 |   | X | X |   | X | X |  |
| 48 | Iran | 35 | F | Post. | n.a.  | n.a.         | n.a. | Birth | X    | X    | OD 2.9; OS 3.0 |   | X | X |   | X | X |  |
| 49 | Iran | 32 | M | Post. | n.a.  | n.a.         | n.a. | 0.5   | X    | X    | OD 2.9; OS 2.9 |   | X | X | X | X | X |  |
| 50 | Iran | 65 | F | Post. | n.a.  | n.a.         | n.a. | 60    | X    |      | OD 0.3; OS 0.4 |   |   | X |   | X |   |  |
| 52 | Iran | 48 | F | Pre.  | Sev   | Steep. slop. | A    | 5     | X    | X    | OD 3.2 OS 2.9  |   |   |   |   |   |   |  |
| 53 | Iran | 13 | F | Pre.  | n.a.  | n.a.         | n.a. | 0.75  | X    | X    | OD 2.0; OS 2.9 |   | X | X |   | X | X |  |
| 54 | Iran | 31 | F | Post. | Mod.  | Flat         | n.a. | 3     | X    | X    | OD 3.2; OS 3.2 |   |   | X |   |   |   |  |
| 55 | Iran | 62 | M | Pre.  | n.a.  | n.a.         | n.a. | Birth | X    | X    | OD 2.0; OS 2.0 |   | X | X |   | X | X |  |
| 56 | Mex. | 7  | F | n.a.  | Prof. | Down slop.   | n.a. | n.a.  | n.a. | n.a. | OD 1.0; OS 0.9 |   |   |   |   | X |   |  |
| 57 | Iran | 43 | M | Pre.  | n.a.  | n.a.         | n.a. | Birth | X    | X    | OD 1.0; OS 1.0 | X | X | X |   |   | X |  |
| 58 | Iran | 17 | M | Pre.  | Mod.  | Flat         | A    | 10    | X    | X    | OD 0.2; OS 0.1 |   | X | X |   | X |   |  |
| 59 | Iran | 47 | M | Pre.  | n.a.  | n.a.         | n.a. | Birth | X    | X    | OD 0.2; OS 0.3 |   | X |   |   |   | X |  |

<sup>a</sup> Patients 19, 20, 33, 40, and 51 with combined vision and hearing impairment were referred by experienced ophthalmologists to the Ophthalmic Research Center of Shahid Beheshti University for genetic diagnosis. However, no additional clinical information is available.

Abbreviations: ID: patient number; Ethn.: ethnicity (Iran = Iranian; Mex. = Mexican); Age (in years); Sex (M = male, F = female); HLO: hearing loss onset (Pre. = prelingual, Post. = postlingual); HLS: hearing loss severity (Mod. = moderate, Sev. = severe, Prof. = profound); Aud.Shape: audioprofile shape (Flat, Down sloping, Steeply sloping); TYM = tympanogram (A = normal middle ear functioning); VIO: visual impairment onset (in years); NL = nyctalopia; RV = reduced vision; VA = visual acuity (LogMAR = logarithm of the minimum angle of resolution, OD = right eye, OS = left eye); CME = cystic macular edema; RA = retinal atrophy; MA = macular atrophy; PED = pigment epithelium degeneration; BPD = bilateral pigment deposit; BC = bilateral cataracts; SEI = subjective equilibrium impairment; n.a. = information not available. For all dichotomous traits, X indicates presence of a given symptom and no X its absence.

**Supplementary Table 2** Variants submitted to the Leiden Open Variation Database (LOVD)

| ID | Gene         | Variant c.         | Variant p.          | Zygotity <sup>a</sup> | Interpretation <sup>b</sup> | LOVD ID <sup>c</sup> |
|----|--------------|--------------------|---------------------|-----------------------|-----------------------------|----------------------|
| 1  | <i>MYO7A</i> | c.1969C>T          | p.(Arg657Trp)       | Hom                   | Pathogenic                  | 00361770             |
| 2  | <i>MYO7A</i> | c.73G>A            | p.(Gly25Arg)        | Hom                   | Pathogenic                  | 00361775             |
| 3  | <i>MYO7A</i> | c.5617C>T          | p.(Arg1873Trp)      | Het                   | Pathogenic                  | 00361778             |
|    | <i>MYO7A</i> | c.2904G>T          | p.(Glu968Asp)       | Het                   | Pathogenic                  |                      |
| 4  | <i>MYO7A</i> | c.5573T>C          | p.(Leu1858Pro)      | Hom                   | Pathogenic                  | 00361779             |
| 5  | <i>MYO7A</i> | c.397dup           | p.(His133Profs*7)   | Hom                   | Pathogenic                  | 00361780             |
| 6  | <i>MYO7A</i> | c.2282+1G>C        | p.?                 | Het                   | Pathogenic                  | 00361781             |
|    | <i>MYO7A</i> | c.721C>T           | p.(Arg241Cys)       | Het                   | Pathogenic                  |                      |
| 7  | <i>MYO7A</i> | c.397dup           | p.(His133Profs*7)   | Het                   | Pathogenic                  | 00361782             |
|    | <i>MYO7A</i> | c.4513G>T          | p.(Glu1505*)        | Het                   | Pathogenic                  |                      |
| 8  | <i>MYO7A</i> | c.487G>A           | p.(Gly163Arg)       | Hom                   | Pathogenic                  | 00361783             |
| 9  | <i>MYO7A</i> | c.3564_3571delinsA | p.(Tyr1188*)        | Hom                   | Pathogenic                  | 00361784             |
| 10 | <i>MYO7A</i> | c.6204dup          | p.(Ile2069Tyrfs*7)  | Het                   | Pathogenic                  | 00361785             |
|    | <i>MYO7A</i> | c.3564_3571delinsA | p.(Tyr1188*)        | Het                   | Pathogenic                  |                      |
| 11 | <i>MYO7A</i> | c.722G>A           | p.(Arg241His)       | Het                   | Likely pathogenic           | 00374000             |
|    | <i>MYO7A</i> | c.1388A>G          | p.(Gln463Arg)       | Het                   | Likely pathogenic           |                      |
| 12 | <i>MYO7A</i> | c.75_82del         | p.(Ala26Glufs*13)   | Hom                   | Pathogenic                  | 00361786             |
| 13 | <i>MYO7A</i> | c.5510T>C          | p.(Leu1837Pro)      | Het                   | Likely pathogenic           | 00374001             |
|    | <i>MYO7A</i> | c.487G>A           | p.(Gly163Arg)       | Het                   | Pathogenic                  |                      |
| 14 | <i>MYO7A</i> | c.496del           | p.(Glu166Argfs*5)   | Het                   | Pathogenic                  | 00374002             |
|    | <i>MYO7A</i> | c.4117C>T          | p.(Arg1373*)        | Het                   | Pathogenic                  |                      |
| 15 | <i>MYO7A</i> | c.6228_6232del     | p.(Asp2076Glufs*50) | Hom                   | Pathogenic                  | 00361787             |
| 16 | <i>MYO7A</i> | c.2914C>T          | p.(Arg972*)         | Hom                   | Pathogenic                  | 00361788             |
| 18 | <i>USH1C</i> | c.2191C>T          | p.(Arg731Trp)       | Het                   | VUS                         | 00361789             |
|    | <i>USH1C</i> | c.658C>G           | p.(Arg220Gly)       | Het                   | VUS                         |                      |
| 41 | <i>CDH23</i> | c.7921G>A          | p.(Asp2641Asn)      | Hom                   | Likely pathogenic           | 00361790             |
| 17 | <i>USH1G</i> | c.742C>T           | p.(Gln248*)         | Hom                   | Pathogenic                  | 00362249             |
| 19 | <i>USH2A</i> | c.4732C>T          | p.(Arg1578Cys)      | Hom                   | Likely pathogenic           | 00361791             |
| 20 | <i>USH2A</i> | c.236_239dup       | p.(Gln81Tyrfs*28)   | Hom                   | Pathogenic                  | 00361792             |
| 21 | <i>USH2A</i> | c.1571C>T          | p.(Ala524Val)       | Het                   | Likely pathogenic           | 00361793             |
|    | <i>USH2A</i> | c.4628-2A>T        | p.?                 | Het                   | Pathogenic                  |                      |
| 22 | <i>USH2A</i> | c.11955G>C         | p.(Trp3985Cys)      | Hom                   | Likely pathogenic           | 00361794             |
| 23 | <i>USH2A</i> | c.12394del         | p.(Leu4132Trpfs*35) | Hom                   | Pathogenic                  | 00361795             |
| 24 | <i>USH2A</i> | c.11357del         | p.(Pro3786Leufs*6)  | Hom                   | Pathogenic                  | 00361796             |
| 25 | <i>USH2A</i> | c.13510G>T         | p.(Glu4504*)        | Het                   | Pathogenic                  | 00361797             |
|    | <i>USH2A</i> | c.13018G>C         | p.(Gly4340Arg)      | Het                   | Likely pathogenic           |                      |
| 26 | <i>USH2A</i> | c.12067-2A>G       | p.?                 | Hom                   | Pathogenic                  | 00361798             |
| 27 | <i>USH2A</i> | c.2512C>T          | p.(Gln838*)         | Het                   | Pathogenic                  | 00374003             |
|    | <i>USH2A</i> | c.2299del          | p.(Glu767Serfs*21)  | Het                   | Pathogenic                  |                      |
| 28 | <i>USH2A</i> | c.5251_5267del     | p.(Gly1751Leufs*2)  | Het                   | Pathogenic                  | 00374004             |
|    | <i>USH2A</i> | c.8141G>A          | p.(Trp2714*)        | Het                   | Pathogenic                  |                      |
| 29 | <i>USH2A</i> | c.5521G>A          | p.(Gly1841Arg)      | Het                   | Likely pathogenic           | 00361807             |
|    | <i>USH2A</i> | c.7915T>C          | p.(Ser2639Pro)      | Het                   | Likely pathogenic           |                      |
| 30 | <i>USH2A</i> | c.8497dup          | p.(Ser2833Lysfs*2)  | Hom                   | Pathogenic                  | 00361809             |
| 31 | <i>USH2A</i> | c.12067-1G>C       | p.?                 | Hom                   | Pathogenic                  | 00362250             |
| 32 | <i>USH2A</i> | c.8682-1G>A        | p.?                 | Het                   | Pathogenic                  | 00373532             |
|    | <i>USH2A</i> | c.2014C>T          | p.(Gln672*)         | Het                   | Pathogenic                  |                      |

|    |                                                             |                                                   |                                                              |                          |                                               |          |
|----|-------------------------------------------------------------|---------------------------------------------------|--------------------------------------------------------------|--------------------------|-----------------------------------------------|----------|
| 42 | <i>USH2A</i><br><i>OTOG</i><br><i>PRPF31</i><br><i>ROM1</i> | c.11389+3A>T<br>c.7454del<br>c.632G>A<br>c.859C>T | p.?<br>p.(Arg2485Hisfs*77)<br>p.(Arg211Gln)<br>p.(Arg287Trp) | Hom<br>Hom<br>Het<br>Het | Pathogenic<br>Pathogenic<br>VUS<br>VUS        | 00362260 |
| 43 | <i>USH2A</i><br><i>USH2A</i><br><i>TECTA</i>                | c.5438C>A<br>c.7595-2144A>G<br>c.2572G>A          | p.(Ser1813*)<br>p.?(DIM) <sup>d</sup><br>p.(Asp858Asn)       | Het<br>Het<br>Het        | Pathogenic<br>Pathogenic<br>VUS               | 00361812 |
| 58 | <i>USH2A</i><br><i>KCNQ1</i>                                | c.236_239dup<br>c.733_734del                      | p.(Gln81Tyrfs*28)<br>p.(Gly245Argfs*39)                      | Hom<br>Het               | Pathogenic<br>Pathogenic                      | 00373531 |
| 33 | <i>ADGRV1</i>                                               | c.9623+3A>C <sup>b</sup>                          | p.?                                                          | Hom                      | Likely pathogenic                             | 00361814 |
| 34 | <i>ADGRV1</i>                                               | c.15736C>T                                        | p.(Arg5246*)                                                 | Hom                      | Pathogenic                                    | 00361816 |
| 35 | <i>ADGRV1</i>                                               | c.4231del                                         | p.(Ala1411Profs*6)                                           | Hom                      | Pathogenic                                    | 00362251 |
| 36 | <i>ADGRV1</i><br><i>ADGRV1</i>                              | c.4231del<br>c.10088_10091del                     | p.(Ala1411Profs*6)<br>p.(Val3363Aspfs*11)                    | Het<br>Het               | Pathogenic<br>Pathogenic                      | 00361817 |
| 38 | <i>ADGRV1</i>                                               | c.9512T>C                                         | p.(Leu3171Ser)                                               | Hom                      | VUS                                           | 00361821 |
| 52 | <i>ADGRV1</i><br><i>ADGRV1</i><br><i>ABCA4</i>              | c.2261T>C<br>c.10878A>C<br>c.4919G>A              | p.(Val754Ala)<br>p.(Lys3626Asn)<br>p.(Arg1640Gln)            | Het<br>Het<br>Hom        | VUS<br>VUS<br>Pathogenic                      | 00361827 |
| 56 | <i>ADGRV1</i><br><i>ADGRV1</i>                              | c.5167C>G<br>c.14939T>C                           | p.(Pro1723Ala)<br>p.(Val4980Ala)                             | Het<br>Het               | VUS<br>VUS                                    | 00362263 |
| 37 | <i>CLRN1</i><br><i>CLRN1</i>                                | c.630del<br>c.625T>A                              | p.(Phe210Leufs*5)<br>p.(Phe209Ile)                           | Hom<br>Hom               | Pathogenic<br>VUS                             | 00361819 |
| 39 | <i>CEP78</i>                                                | c.515T>G                                          | p.(Ile172Arg)                                                | Hom                      | VUS                                           | 00361822 |
| 40 | <i>CEP78</i><br><i>CEP78</i>                                | c.515T>G<br>c.534del                              | p.(Ile172Arg)<br>p.(Lys179Argfs*10)                          | Het<br>Het               | VUS<br>Pathogenic                             | 00361825 |
| 46 | <i>PEX26</i>                                                | c.349C>A                                          | p.(Pro117Thr)                                                | Hom                      | VUS                                           | 00361831 |
| 47 | <i>ALMS1</i>                                                | c.6299C>A                                         | p.(Ser2100*)                                                 | Hom                      | Pathogenic                                    | 00361833 |
| 48 | <i>ALMS1</i>                                                | c.7471_7472del                                    | p.(Ser2491Thrfs*5)                                           | Hom                      | Pathogenic                                    | 00361835 |
| 49 | <i>ALMS1</i>                                                | c.11410C>T                                        | p.(Arg3804*)                                                 | Hom                      | Pathogenic                                    | 00361837 |
| 50 | <i>IDUA</i><br><i>USH2A</i><br><i>ADGRV1</i>                | c.956C>T<br>c.3045C>G<br>c.1563del                | p.(Ala319Val)<br>p.(His1015Gln)<br>p.(Pro522Leufs*18)        | Hom<br>Het<br>Het        | Likely pathogenic<br>Pathogenic<br>Pathogenic | 00362252 |
| 51 | <i>PDSS2</i><br><i>PDSS2</i><br><i>USH2A</i>                | c.702+1G>A <sup>b</sup><br>c.488G>A<br>c.174T>A   | p.?<br>p.(Arg163His)<br>p.(Cys58*)                           | Het<br>Het<br>Het        | Likely pathogenic<br>VUS<br>Pathogenic        | 00362261 |
| 54 | <i>ABCC6</i>                                                | c.1171A>G                                         | p.(Arg391Gly)                                                | Hom                      | VUS                                           | 00375267 |
| 44 | <i>MYH14</i><br><i>FBN2</i><br><i>FBN2</i>                  | c.4732A>G<br>c.7355A>C<br>c.2507C>T               | p.(Lys1578Glu)<br>p.(Glu2452Ala)<br>p.(Thr836Met)            | Het<br>Het<br>Het        | VUS<br>VUS<br>VUS                             | 00362254 |
| 45 | <i>RHO</i><br><i>MEFV</i>                                   | c.659T>G<br>c.2040G>C                             | p.(Phe220Cys)<br>p.(Met680Ile)                               | Het<br>Het               | Likely Pathogenic<br>Pathogenic               | 00362253 |
| 53 | <i>PRPF8</i><br><i>CACNA2D4</i>                             | c.6462C>A<br>c.2551+8C>T                          | p.(His2154Gln)<br>p.?                                        | Het<br>Hom               | VUS<br>VUS                                    | 00362262 |
| 57 | <i>USH2A</i>                                                | c.5388T>A                                         | p.(Cys1796*)                                                 | Het                      | Pathogenic                                    | 00375269 |
| 59 | <i>MYO7A</i><br><i>CDH23</i><br><i>G6PD</i>                 | c.3750+7G>A<br>c.5653C>T<br>c.1057C>T             | p.?<br>p.(Arg1885Cys)<br>p.(Pro353Ser)                       | Het<br>Het<br>Hemi       | VUS<br>VUS<br>Pathogenic                      | 00375266 |

<sup>a</sup> Hom = homozygous; Het = heterozygous; Hemi = hemizygous

<sup>b</sup> VUS = variant of uncertain significance

<sup>c</sup> LOVD ID refers to individual ID

<sup>d</sup> DIM = deep intronic mutation

## *ADGRV1* c.9623+3A>C

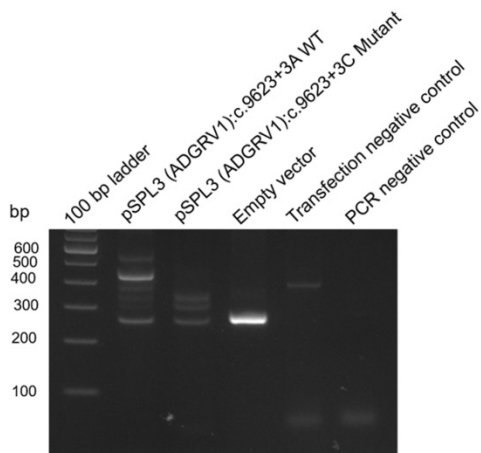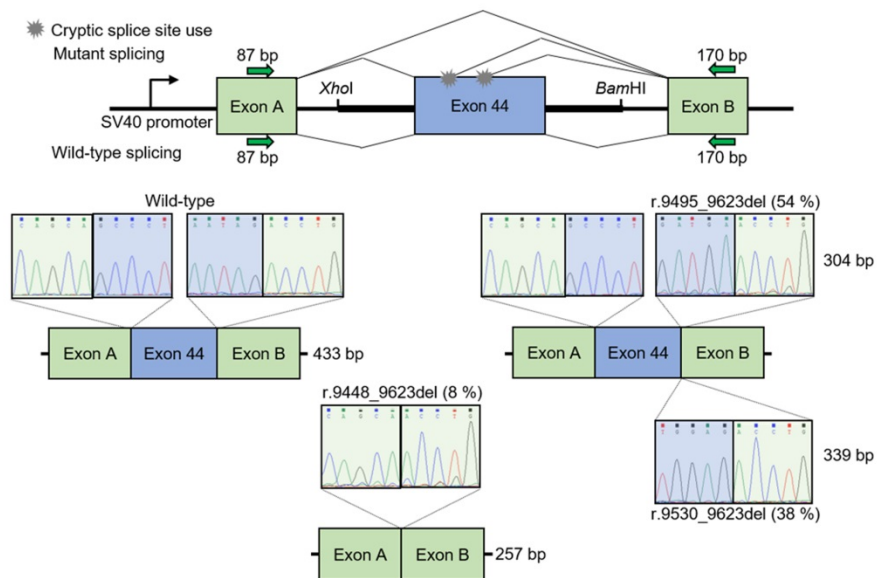

## *PDSS2* c.702+1G>A

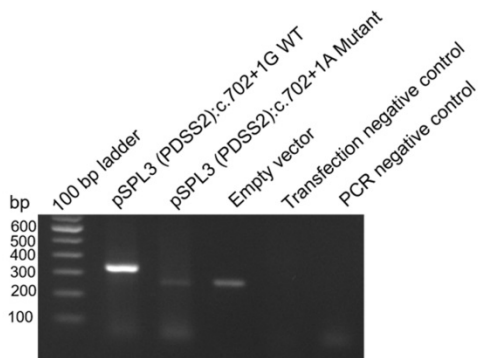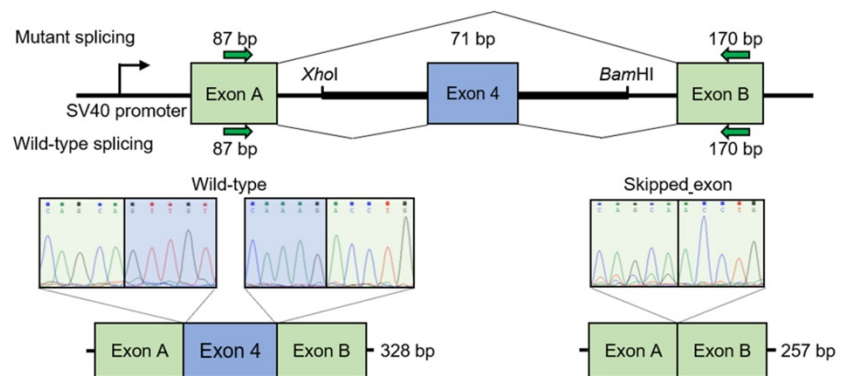

**Supplementary figure 1** The upper panel shows the *in vitro* splice assay results for the *ADGRV1* c.9623+3A>C variant. Gel electrophoresis of the reverse-transcription polymerase chain reaction (RT-PCR) from the wild-type (WT) control, the *ADGRV1* c.9623+3C mutant allele, empty pSPL3 vector amplicons, and transfection negative and PCR negative controls. The vector construct illustrates the WT or mutant amplicons inserted between exons A and B of the pSPL3 vector with a splicing schematic of the c.9623+3C mutant (upper) and WT allele (lower). The WT (upper left sequencing panel) shows expected splicing. The mutant vector shows usage of two cryptic splice donor sites, yielding an in-frame deletion r.9495\_9623del, p.(Tyr3166\_Arg3208del), frameshift deletion r.9530\_9623del, p.(Gly3177Glufs\*5), and

skipping of exon 44 r.9448\_9623del, p.(Ala3150Serfs\*11). The relative fraction of abnormally spliced transcripts due to the variant are shown in percentages in parenthesis. The lower panel shows the in vitro splice assay results for the *PDSS2* c.702+1G>A variant. Gel electrophoresis of the RT-PCR from the WT control, the *PDSS2* c.702+1A mutant allele, and empty pSPL3 vector amplicons, as well as transfection negative and PCR negative controls. The vector construct of the in vitro splice assay illustrates the WT or mutant amplicons with a splicing schematic of the c.702+1A mutant (upper) and WT allele (lower). The WT (left sequencing panel) shows expected splicing. The mutant vector shows skipping of exon 4 (right sequencing panel), leading to an in-frame deletion r.631\_702del, p.(Val211\_Lys234del).
